# Supplementary material for: In vivo self-renewal and expansion of quiescent stem cells from a non-human primate
Source: Springer Nature journal article supplement (doi:10.1038/s41467-025-58897-x), 2025-06-24
Supplement: MOESM12 [file 41467_2025_58897_MOESM12_ESM.pdf]

Reporting Summary

Nature Portfolio wishes to improve the reproducibility of the work that we publish. This form provides structure for consistency and transparency in reporting. For further information on Nature Portfolio policies, see our [Editorial Policies](#) and the [Editorial Policy Checklist](#).

Statistics

For all statistical analyses, confirm that the following items are present in the figure legend, table legend, main text, or Methods section.

|                                     |                                                                                                                                                                                                                                                                                                |
|-------------------------------------|------------------------------------------------------------------------------------------------------------------------------------------------------------------------------------------------------------------------------------------------------------------------------------------------|
| n/a                                 | Confirmed                                                                                                                                                                                                                                                                                      |
| <input type="checkbox"/>            | <input checked="" type="checkbox"/> The exact sample size ( <i>n</i> ) for each experimental group/condition, given as a discrete number and unit of measurement                                                                                                                               |
| <input type="checkbox"/>            | <input checked="" type="checkbox"/> A statement on whether measurements were taken from distinct samples or whether the same sample was measured repeatedly                                                                                                                                    |
| <input type="checkbox"/>            | <input checked="" type="checkbox"/> The statistical test(s) used AND whether they are one- or two-sided<br><i>Only common tests should be described solely by name; describe more complex techniques in the Methods section.</i>                                                               |
| <input checked="" type="checkbox"/> | <input type="checkbox"/> A description of all covariates tested                                                                                                                                                                                                                                |
| <input type="checkbox"/>            | <input checked="" type="checkbox"/> A description of any assumptions or corrections, such as tests of normality and adjustment for multiple comparisons                                                                                                                                        |
| <input type="checkbox"/>            | <input checked="" type="checkbox"/> A full description of the statistical parameters including central tendency (e.g. means) or other basic estimates (e.g. regression coefficient) AND variation (e.g. standard deviation) or associated estimates of uncertainty (e.g. confidence intervals) |
| <input type="checkbox"/>            | <input checked="" type="checkbox"/> For null hypothesis testing, the test statistic (e.g. <i>F</i> , <i>t</i> , <i>r</i> ) with confidence intervals, effect sizes, degrees of freedom and <i>P</i> value noted<br><i>Give P values as exact values whenever suitable.</i>                     |
| <input checked="" type="checkbox"/> | <input type="checkbox"/> For Bayesian analysis, information on the choice of priors and Markov chain Monte Carlo settings                                                                                                                                                                      |
| <input checked="" type="checkbox"/> | <input type="checkbox"/> For hierarchical and complex designs, identification of the appropriate level for tests and full reporting of outcomes                                                                                                                                                |
| <input checked="" type="checkbox"/> | <input type="checkbox"/> Estimates of effect sizes (e.g. Cohen's <i>d</i> , Pearson's <i>r</i> ), indicating how they were calculated                                                                                                                                                          |

Our web collection on [statistics for biologists](#) contains articles on many of the points above.

Software and code

Policy information about [availability of computer code](#)

|                 |                                                                                                                                                                                                                                                                                                                                                                                                                                 |
|-----------------|---------------------------------------------------------------------------------------------------------------------------------------------------------------------------------------------------------------------------------------------------------------------------------------------------------------------------------------------------------------------------------------------------------------------------------|
| Data collection | FACS and flow cytometry: FACSDIVA 8+ (BD Bioscience)<br>Fluorescent microscope images: CellReporterXpress (Molecular devices), Volocity 5+ (PerkinElmer), ZEN 2.3 (Carl Zeiss), BX63 (Olympus)<br>RT-qPCR: LightCycler 480 1.5.0 SP3 (Roche)<br>BLI imaging: IVIS Living Image Software, version 4.0 (Caliper Life Sciences, Perkin Elmer)<br>Microfluidic PCR: Biomark (Fluidigm)<br>Single cell western: Milo (ProteinSimple) |
| Data analysis   | Image analysis: Volocity 5+ (PerkinElmer), Image J 1.53t (National Institutes of Health), CellReporterXpress (Molecular devices), Huygens Essential 16.10.1p4 (Scientific Volume Imaging B. V.), ImageJ Fiji<br>Flow cytometry: FlowJo v10.8.1 (BD Biosciences)<br>BLI imaging: IVIS Lumina Series 4.8.0 (PerkinElmer)<br>CyTOF data: Cell Engine (Cellcarta)<br>Statistics: Excel (Microsoft), Prism 10 (Graphpad)             |

For manuscripts utilizing custom algorithms or software that are central to the research but not yet described in published literature, software must be made available to editors and reviewers. We strongly encourage code deposition in a community repository (e.g. GitHub). See the Nature Portfolio [guidelines for submitting code & software](#) for further information.

## Data

Policy information about [availability of data](#)

All manuscripts must include a [data availability statement](#). This statement should provide the following information, where applicable:

- Accession codes, unique identifiers, or web links for publicly available datasets
- A description of any restrictions on data availability
- For clinical datasets or third party data, please ensure that the statement adheres to our [policy](#)

Tabula Microcebus mouse lemur scRNAseq gene expression counts/UMI tables, and cellular metadata used in this study are available on "figshare [[https://figshare.com/projects/Tabula\\_Microcebus/112227](https://figshare.com/projects/Tabula_Microcebus/112227)]". For the cross-species comparison, human data were from the 10x data of the "Tabula Sapiens for the muscle [[https://figshare.com/projects/Tabula\\_Sapiens/100973](https://figshare.com/projects/Tabula_Sapiens/100973)]". Mouse data were from 10x data of the "Tabula Muris Senis [[https://figshare.com/articles/dataset/Processed\\_files\\_to\\_use\\_with\\_scanpy\\_/8273102/2](https://figshare.com/articles/dataset/Processed_files_to_use_with_scanpy_/8273102/2)]". Crab-eating macaque data were from the 10x data of the cynomolgus monkey cell atlas, available on "Zenodo [<https://zenodo.org/records/5881495#.ZERMcnbMKUk>]".

All other data supporting the findings of this study are available within the article and its supplementary files. Source data are provided with this paper. Any additional requests for information can be directed to, and will be fulfilled by, the corresponding authors.

## Research involving human participants, their data, or biological material

Policy information about studies with [human participants or human data](#). See also policy information about [sex, gender \(identity/presentation\), and sexual orientation](#) and [race, ethnicity and racism](#).

Reporting on sex and gender [Sex of all donors is reported in the methods section](#)

Reporting on race, ethnicity, or other socially relevant groupings

*Please specify the socially constructed or socially relevant categorization variable(s) used in your manuscript and explain why they were used. Please note that such variables should not be used as proxies for other socially constructed/relevant variables (for example, race or ethnicity should not be used as a proxy for socioeconomic status). Provide clear definitions of the relevant terms used, how they were provided (by the participants/respondents, the researchers, or third parties), and the method(s) used to classify people into the different categories (e.g. self-report, census or administrative data, social media data, etc.) Please provide details about how you controlled for confounding variables in your analyses.*

Population characteristics

*Describe the covariate-relevant population characteristics of the human research participants (e.g. age, genotypic information, past and current diagnosis and treatment categories). If you filled out the behavioural & social sciences study design questions and have nothing to add here, write "See above."*

Recruitment

The muscle biopsy samples were donated via Donor Network West (DNW).

Ethics oversight

Donor Network West internal ethics committee; Institutional Review Board at Stanford University.

Note that full information on the approval of the study protocol must also be provided in the manuscript.

## Field-specific reporting

Please select the one below that is the best fit for your research. If you are not sure, read the appropriate sections before making your selection.

☒ Life sciences ☐ Behavioural & social sciences ☐ Ecological, evolutionary & environmental sciences

For a reference copy of the document with all sections, see [nature.com/documents/nr-reporting-summary-flat.pdf](https://www.nature.com/documents/nr-reporting-summary-flat.pdf)

## Life sciences study design

All studies must disclose on these points even when the disclosure is negative.

Sample size

No sample-size calculation was performed. Sample sizes were chosen based on the types of experiment, availability of animals, and standard practice when using individual animals as biological replicates (general range n=3-4). Sample size was informed by availability (mouse lemur tissues were harvested opportunistically).

Data exclusions

No data were excluded from the analyses.

Replication

All experiments were replicated across multiple individuals. Reproducibility was ensured by the use of complementary assays. Experiments were reproducible across different days and investigators.

Randomization

No randomization was used. Samples were split into control and treated groups.

Blinding

Investigators were blinded during data analysis. Clear cutoffs and automated analyses were used to minimize the effects of investigator bias.

# Reporting for specific materials, systems and methods

We require information from authors about some types of materials, experimental systems and methods used in many studies. Here, indicate whether each material, system or method listed is relevant to your study. If you are not sure if a list item applies to your research, read the appropriate section before selecting a response.

| Materials & experimental systems    |                                                                 | Methods                             |                                                    |
|-------------------------------------|-----------------------------------------------------------------|-------------------------------------|----------------------------------------------------|
| n/a                                 | Involved in the study                                           | n/a                                 | Involved in the study                              |
| <input type="checkbox"/>            | <input checked="" type="checkbox"/> Antibodies                  | <input checked="" type="checkbox"/> | <input type="checkbox"/> ChIP-seq                  |
| <input checked="" type="checkbox"/> | <input type="checkbox"/> Eukaryotic cell lines                  | <input type="checkbox"/>            | <input checked="" type="checkbox"/> Flow cytometry |
| <input checked="" type="checkbox"/> | <input type="checkbox"/> Palaeontology and archaeology          | <input checked="" type="checkbox"/> | <input type="checkbox"/> MRI-based neuroimaging    |
| <input type="checkbox"/>            | <input checked="" type="checkbox"/> Animals and other organisms |                                     |                                                    |
| <input checked="" type="checkbox"/> | <input type="checkbox"/> Clinical data                          |                                     |                                                    |
| <input checked="" type="checkbox"/> | <input type="checkbox"/> Dual use research of concern           |                                     |                                                    |
| <input checked="" type="checkbox"/> | <input type="checkbox"/> Plants                                 |                                     |                                                    |

## Antibodies

### Antibodies used

Antibodies are listed in the manuscript in Supplementary Data 1.

FITC-anti-CD31 (BioLegend; #102506, clone MEC13.3)  
 FITC-anti-CD45 (BioLegend; #103108, clone 30-F11)  
 Pacific blue-anti-Sca1 (BioLegend; #108120, clone D7)  
 PE/Cy7-anti-VCAM (BioLegend; #105720, clone 429)  
 APC-anti-human CD31 (BioLegend; #303116, clone WM59)  
 FITC-anti-human CD45 (Invitrogen; #MHCD4501, clone HI30)  
 PE-anti-human CD90 (BioLegend; #328110, clone 5E10)  
 PE/Cy7-anti-human CD82 (BioLegend; #342110, clone ASL-24)  
 CD29 (ITGB1) mouse TS2/16 BioLegend  
 CD34 mouse 581 BioLegend  
 CD82 mouse ASL-24 BioLegend  
 CFD rabbit PA5-79034 Sigma  
 CXCR4 mouse 12G5 BioLegend  
 GLIS3 rabbit HPA056426 Sigma  
 HNRNPA1 rabbit HPA007185 Sigma  
 MYH2 mouse 2F7 DSHB  
 MyoD mouse 5.8A BD Biosciences  
 MyoG mouse F5D BD Biosciences  
 NCAM1 mouse MEM-188 BioLegend  
 OAZ1 rabbit NBP1-88925 Novus  
 PAX7 mouse PAX7-c DSHB  
 PDGFRA rabbit ab134123 Abcam  
 PLIN1 rabbit D1D8 Cell Signaling  
 RUNX2 rabbit HPA022040 Sigma  
 SAT1 rabbit NB110-41622 Novus  
 SGCA rabbit HPA007537 Sigma  
 SMA rabbit D4K9N Cell Signaling  
 SP7 rabbit HPA063202 Sigma  
 Spermidine rabbit NB100-1847 Novus  
 SRM rabbit ab241508 Abcam  
 TUBB rabbit ab6046 Abcam  
 anti-luciferase #L0159 Sigma-Aldrich  
 anti-GFP A11122 Invitrogen  
 anti-rabbit-biotin A16039 Invitrogen  
 anti-rabbit-647 A31573 Invitrogen  
 anti-rabbit-488, A21206 Invitrogen  
 anti-mouse-488 A21202 Invitrogen  
 anti-mouse-647 A-31571 Invitrogen

### Validation

Species reactivity is listed in the manuscript Supplementary Data 1

FITC-anti-CD31 (MEC13.3), FITC-anti-CD45 (30-F11), and Pacific blue-anti-Sca1 (D7) were validated on mouse splenocytes by manufacturer and have been characterized in its use for FACS-isolating mouse muscle stem cells in Liu et al., 2013 Nature Protocols.  
 PE/Cy7-anti-VCAM (429) was validated on mouse bone marrow cells by manufacturer and have been characterized in its use for FACS-isolating mouse muscle stem cells in Liu et al., 2013 Nature Protocols.  
 APC-anti-human CD31 (WM59) was validated on human peripheral blood lymphocytes, monocytes, and granulocytes by manufacturer, and have been characterized in its use for FACS-isolating human muscle stem cells in Charville et al., 2015 Stem Cell Reports.  
 FITC-anti-human CD45 (HI30) was validated in rabbit amniotic cells, spiked cells, and human bone marrow samples by external data collected by manufacturer, and have been characterized in its use for FACS-isolating human muscle stem cells in Charville et al., 2015

## Stem Cell Reports.

PE-anti-human CD90 (5E10) was validated on human erythroleukemic cell line by manufacturers, and have been characterized in its use for FACS-isolating human muscle stem cells in Charville et al., 2015 Stem Cell Reports.

PE/Cy7-anti-human CD82 (ASL-24) was validated on human peripheral blood lymphocytes by manufacturer, and have been characterized in its use for FACS-isolating human muscle stem cells in Charville et al., 2015 Stem Cell Reports.

PE/Cy7-anti-human-NCAM1 (MEM-188) Each lot is quality control tested by immuno-fluorescent staining with flow cytometric analysis by manufacturer

Pax7 (Pax7-c) was validated in various species including human and mouse by manufacturer and extensive use in other studies.

Spermidine synthase (ab241508) was validated in various cell lines by manufacturer and kang et al 2024 Nature Metabolism.

Sat1 (NB110-41622) was validated in mouse seminal vesical and prostate tissue by manufacturer, and extensive use in other studies.

OAZ1 (NBP1-88925) was validated in human skeletal muscle by manufacturer.

Spermidine (ab7318) was validated in rat lung tissue by manufacturer and other studies.

CFD (PA5-79034) was validated in mouse small intestine tissue by manufacturer

CXCR4 (12G5) was validated in knockout cells by manufacturer

GLIS3 (HPA056426) was validated in human galbladder by manufacturer

HNRNPA1 (HPA007185) was validated in U2OS cells by manufacturer

MYH2 (2F7) was validated in mouse muscle by manufacturer

MyoD (5.8A) validated on MyoD knockout cells in de Morree et al, 2017, PNAS.

MyoG (F5D) was validated in mouse c2c12 cells by manufacturer

PDGFRA (ab134123) was validated in human colon tissue by manufacturer

PLIN1 (D1D8) was validated in mouse brown fat by manufacturer

RUNX2 (HPA022040) was validated in human lymph node by manufacturer

SGCA (HPA007537) was validated in human heart muscle by manufacturer

SMA (D4K9N) was validated in mouse small intestine by manufacturer

SRM (ab241508) was validated in HEK293T cells by manufacturer

SP7/Osteryx (HPA063202) was validated in human testis by manufacturer

TUBB (ab6046) was validated in immunoprecipitation experiments by manufacturer

## Animals and other research organisms

Policy information about [studies involving animals](#); [ARRIVE guidelines](#) recommended for reporting animal research, and [Sex and Gender in Research](#)

### Laboratory animals

Microcebus murinus; Macaca fascicularis; Mus musculus;  
Old mice used in this study were obtained from CHARLES RIVES LABORATORIES through the National Institute on Aging. NSG mice (#005557) were purchased from The Jackson Laboratory.

### Wild animals

This study does not involve wild animals.

### Reporting on sex

Males and females were used

### Field-collected samples

This study does not involve samples collected from the field.

### Ethics oversight

All animal studies were approved by local ethics committees. Stanford University Administrative Panel on Laboratory Animal Care; Administrative Panel on Laboratory Animal Care of the VA Palo Alto Health Care System; Animal Welfare Inspectorate Denmark; Animal Welfare Board at Aarhus University.

Note that full information on the approval of the study protocol must also be provided in the manuscript.

## Plants

### Seed stocks

*Report on the source of all seed stocks or other plant material used. If applicable, state the seed stock centre and catalogue number. If plant specimens were collected from the field, describe the collection location, date and sampling procedures.*

### Novel plant genotypes

*Describe the methods by which all novel plant genotypes were produced. This includes those generated by transgenic approaches, gene editing, chemical/radiation-based mutagenesis and hybridization. For transgenic lines, describe the transformation method, the number of independent lines analyzed and the generation upon which experiments were performed. For gene-edited lines, describe the editor used, the endogenous sequence targeted for editing, the targeting guide RNA sequence (if applicable) and how the editor was applied.*

### Authentication

*Describe any authentication procedures for each seed stock used or novel genotype generated. Describe any experiments used to assess the effect of a mutation and, where applicable, how potential secondary effects (e.g. second site T-DNA insertions, mosaicism, off-target gene editing) were examined.*

# Flow Cytometry

## Plots

Confirm that:

- ☒ The axis labels state the marker and fluorochrome used (e.g. CD4-FITC).
- ☒ The axis scales are clearly visible. Include numbers along axes only for bottom left plot of group (a 'group' is an analysis of identical markers).
- ☒ All plots are contour plots with outliers or pseudocolor plots.
- ☒ A numerical value for number of cells or percentage (with statistics) is provided.

## Methodology

Sample preparation

Skeletal muscles were harvested postmortem by an experienced veterinarian. Tissues were mechanically dissociated and digested with Collagenase II. A second digestion was performed with Collagenase II and Dispase. The resulting cell suspensions were pulled through 25- gauge needles and pushed through 100 µm and 40 µm filters. The resulting single cell suspensions were stained with antibodies for 15 min at 4°C with head-over-head rotation. Cells were washed, filtered, and analyzed on calibrated BD-FACS Aria II or BD FACSAria III flow cytometers equipped with 488-nm, 633-nm and 405-nm lasers.

Instrument

BD Aria III

Software

FACSDIVA 8+ (BD Biosciences) and FlowJo

Cell population abundance

MuSCs (~0.5-1%) and FAPs (~1-2%) purity was assessed by re-sort or by antibody staining of the sorted cells, as detailed in the manuscript.

Gating strategy

Mouse lemur: Gating for CD90 or CD56  
 Mouse: Negative selection for CD31 and CD45. Positive selection for Ly6/A (Sca1) or VCAM1.  
 Human: Negative selection for CD31 and CD45. Positive selection for CD90 or CD82

- ☒ Tick this box to confirm that a figure exemplifying the gating strategy is provided in the Supplementary Information.
